# Supplementary material for: Preparation of an electrochemical sensor based on the surface molecular imprinting technique and its application in the detection of proteins
Source: Research Square preprint supplement (doi:10.21203/rs.3.rs-8294322/v1), 2025-12-17
Supplement: Supplementary file 1 [file 4183ab255291900d47306c04.docx]

Supporting Information

Preparation of an Electrochemical Sensor Based on the Surface Molecular Imprinting Technique and Its Application in the Detection of Proteins

Menggai Jia1,a, Yingqi Li1,a, Ziyao Qina, Longwei Lia, Ling Penga, Molin Yangb, Beibei Hu*,a, Zhiwei Li**,a, Shiguo Sun***,c

a College of Chemical and Pharmaceutical Engineering, Hebei University of Science and Technology, 26 Yuxiang Road, Shijiazhuang 050018, P. R. China

b Dermatology Department, the Fourth Hospital of Hebei Medical University, 12 Jiankang Road, Shijiazhuang 050018, P. R. China

c Shaanxi Key Laboratory of Natural Products & Chemical Biology, College of Chemistry & Pharmacy, Northwest A&F University, Yangling, Shaanxi 712100, P.R. China

*Corresponding author: Beibei Hu

College of Chemical and Pharmaceutical Engineering, Hebei University of Science and Technology, 26 Yuxiang Road, Shijiazhuang 050018, P. R. China

E-mail: hub2018@hebust.edu.cn (Beibei Hu).

Tel: +86-311-81668390 Fax: +86-311-81668390

**Corresponding author: Shiguo Sun

Shaanxi Key Laboratory of Natural Products & Chemical Biology, College of Chemistry & Pharmacy, Northwest A&F University, Yangling, Shaanxi 712100, P.R. China

E-mail: sunsg@nwsuaf.edu.cn.

Tel: +86-311-81668391 Fax: +86-311-81668391

***Corresponding author: Zhiwei Li

College of Chemical and Pharmaceutical Engineering, Hebei University of Science and Technology, 26 Yuxiang Road, Shijiazhuang 050018, P. R. China

E-mail: lizhizwei@hebust.edu.cn (Zhiwei Li).

Tel: +86-311-81668391 Fax: +86-311-81668391

1 These authors contributed equally to this work.


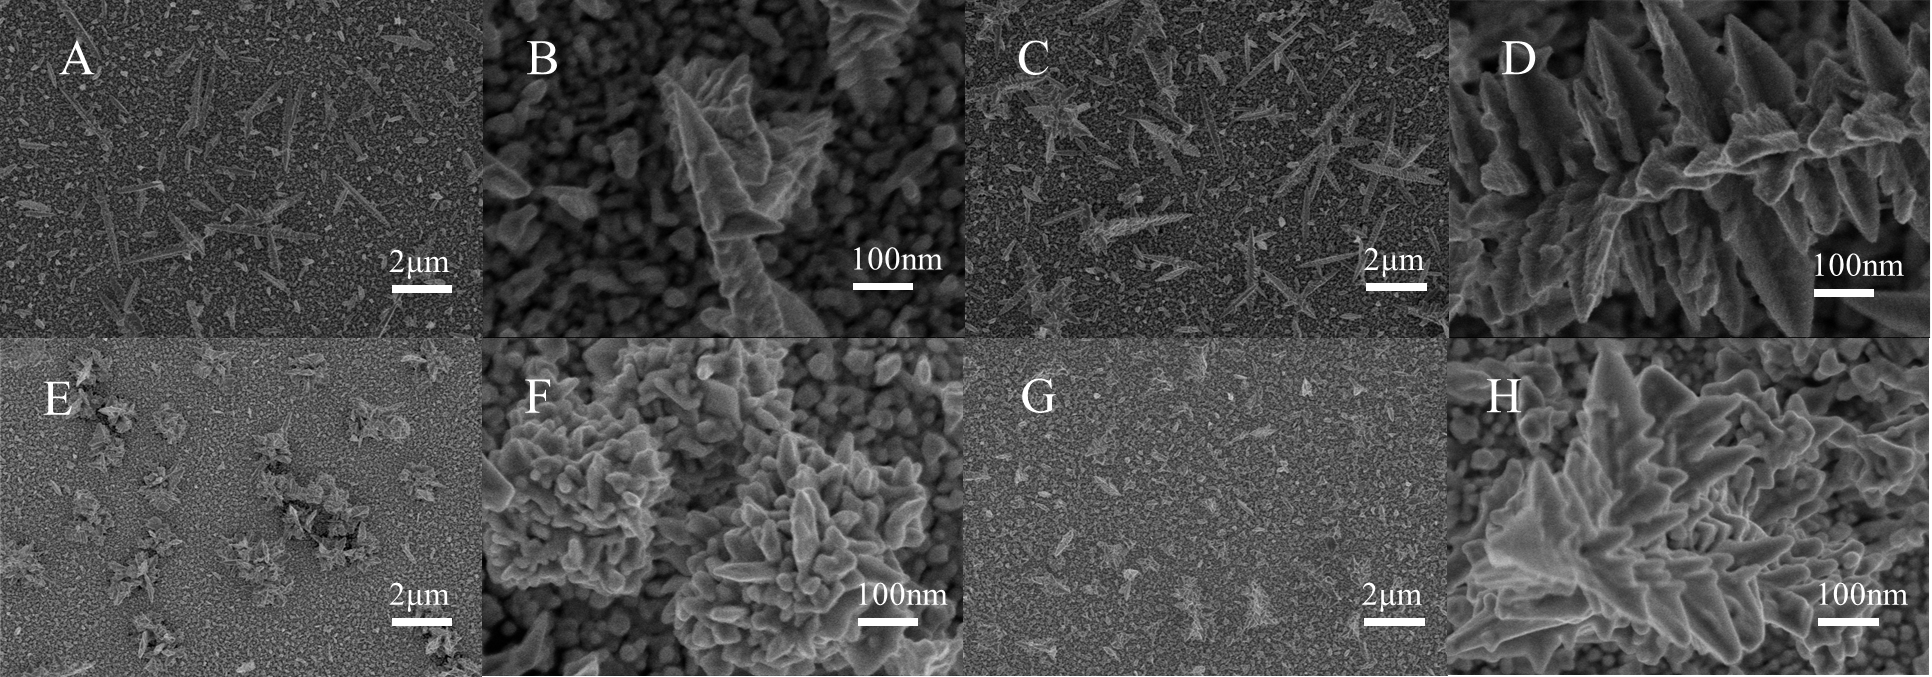


Fig. S1. SEM images of MIP/NIP/AuNPs/GCE sensors. Pre-elution MIP (A-B); Post-elution MIP (C-D); Pre-elution NIP (E-F); Post-elution NIP (G-H).


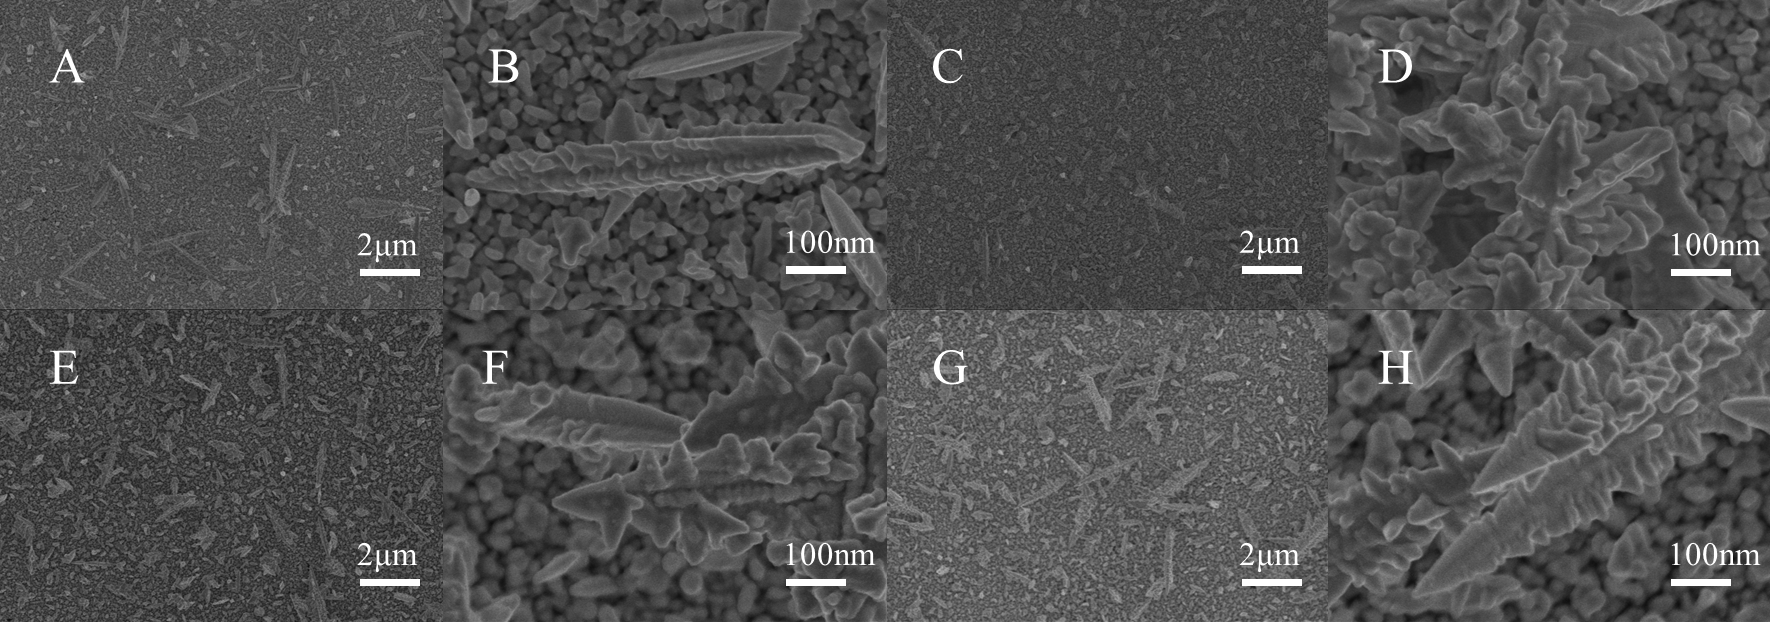


Fig. S2. SEM images of the MIP/NIP/GA@CS/AuNPs/GCE sensor. MIP (A-B), Post-elution of MIP (C-D), Pre-elution of NIP (E-F), Post-elution of NIP (G-H).


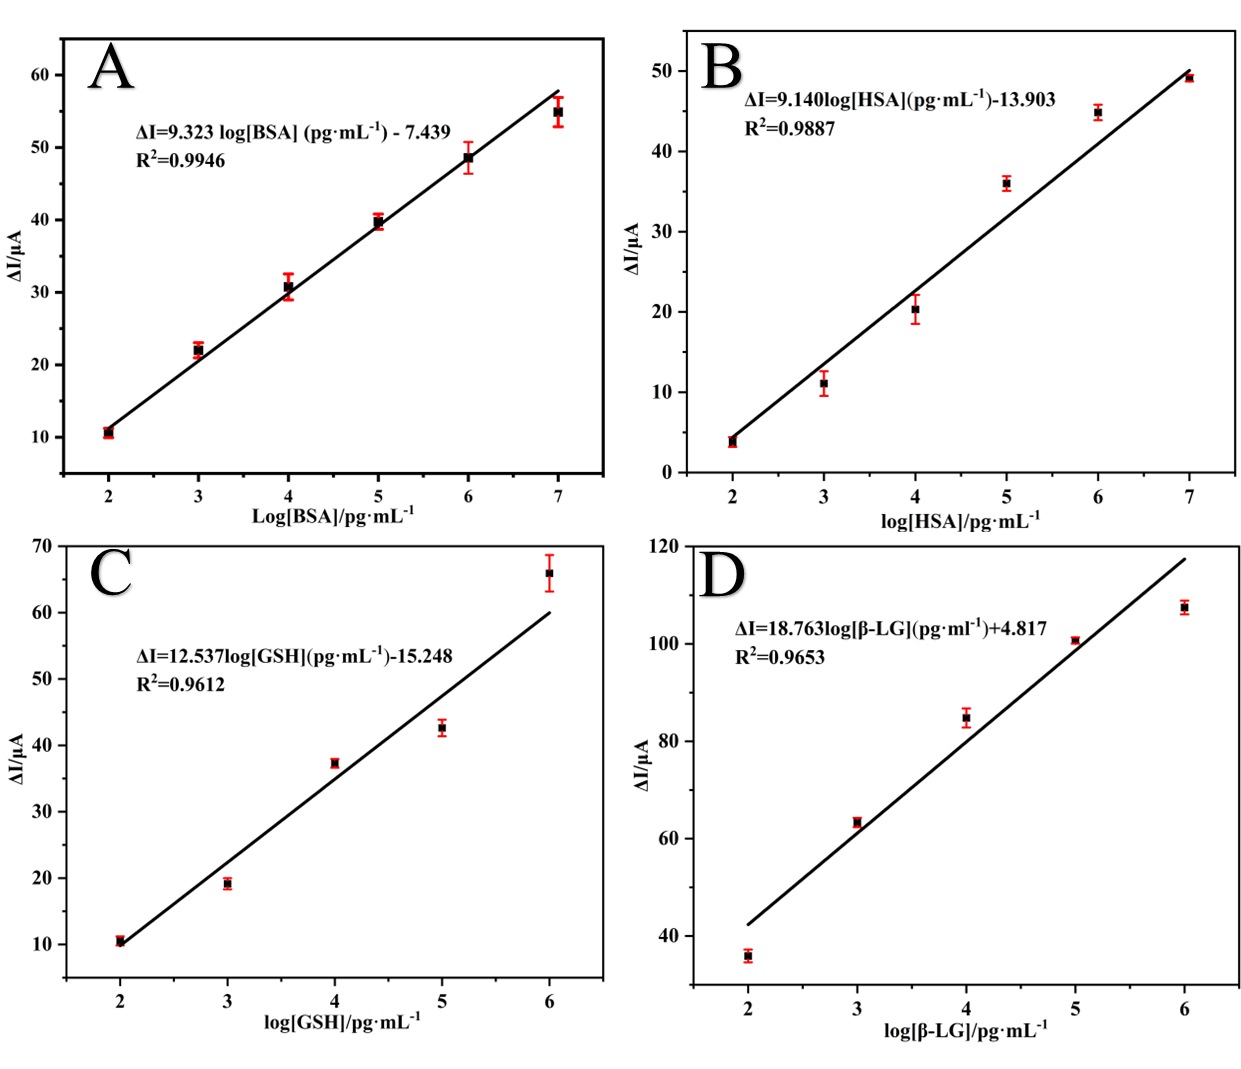


Fig. S3. Standard curves of BSA(A), HSA(B), GSH(C), and β-LG(D) detected by MIP/AuNPs/GCE sensor respectively.


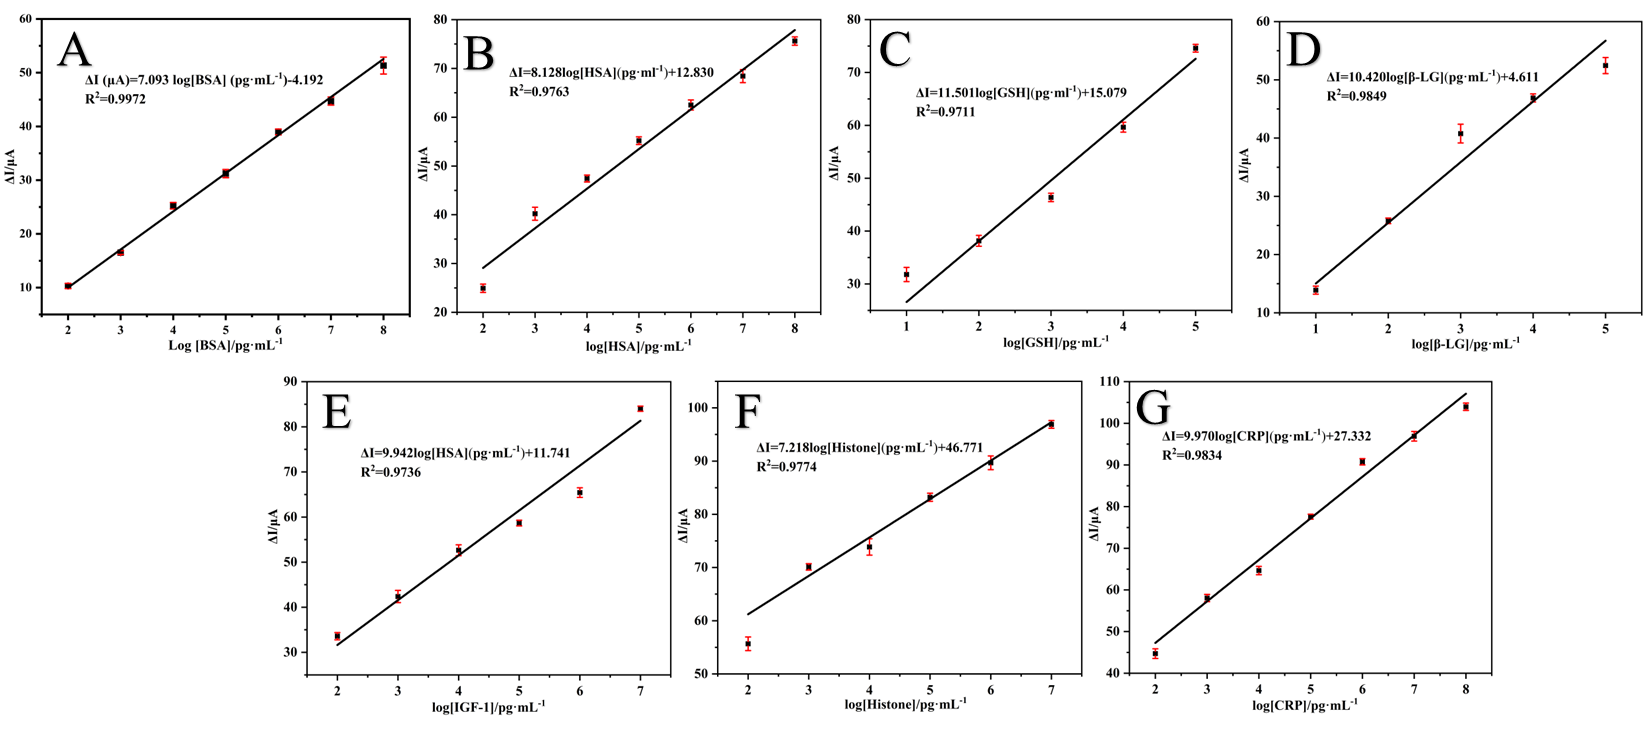


Fig. S4. Standard curves of BSA(A), HSA(B), GSH(C), β-LG(D), IGF-1(E), Histone(F) and CRP(G) detected by MIP/GA@CS/AuNPs/GCE sensor respectively.


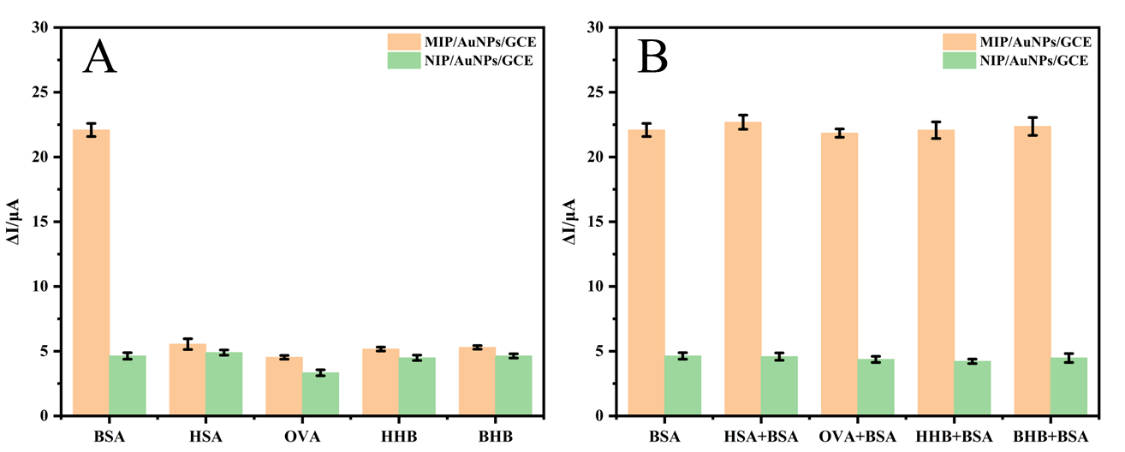


Fig. S5. The conventional selectivity analysis(A) and interference selectivity analysis(B) of MIP/AuNPs/GCE and NIP/AuNPs/GCE. The concentration ratio of BSA to interfering protein was 1:100.


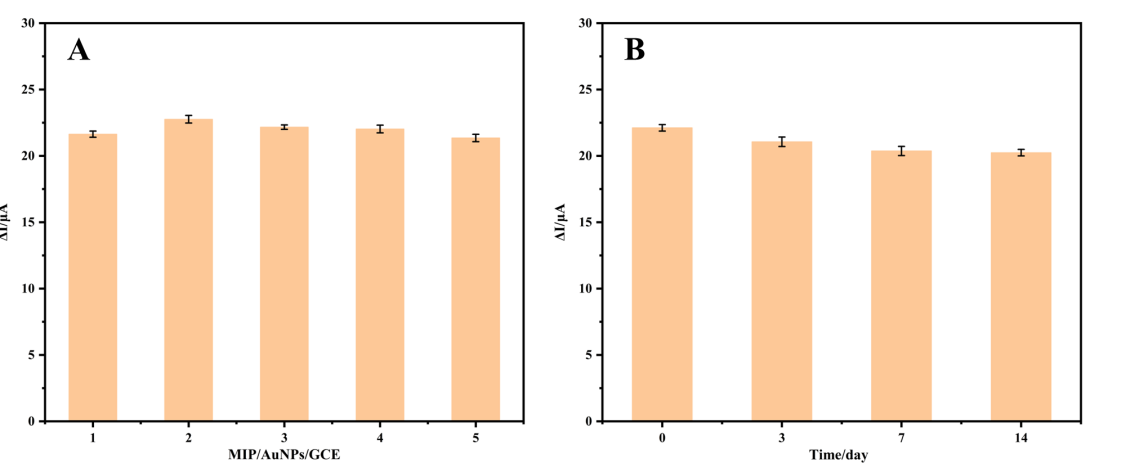


Fig. S6. The repeatability(A) and long-term stability(B) of MIP/AuNPs/GCE.
